# Supplementary material for: A Biotin Biosynthesis Gene Restricted to Helicobacter
Source: PubMed Central journal article supplement (PMC4751477; doi:10.1038/srep21162), 2016-02-12
Supplement: srep21162-s1.pdf [file srep21162-s1.pdf]

Supplement to:

A Biotin Biosynthesis Gene Restricted to *Helicobacter*

Hongkai Bi<sup>1,2\*</sup>, Lei Zhu<sup>3</sup>, Jia Jia<sup>1,2</sup> and John E. Cronan<sup>3,4\*</sup>

<sup>1</sup>Department of Pathogenic Biology, <sup>2</sup>Key Laboratory of Pathogen Biology of Jiangsu Province, Nanjing Medical University, 140 Hanzhong Road, Nanjing, Jiangsu 210029, China

Departments of <sup>3</sup>Microbiology and <sup>4</sup>Biochemistry, University of Illinois, B103 Chemical and Life Sciences Laboratory, 601 S. Goodwin Ave, Urbana, Illinois 61801, USA.

**Supplementary Table 1. Bacterial strains and plasmids used in this study**

| <b>Bacterial Strains</b> | <b>Genotype</b>                                                                                                       | <b>Reference or source</b> |
|--------------------------|-----------------------------------------------------------------------------------------------------------------------|----------------------------|
| <i>E. coli</i>           |                                                                                                                       |                            |
| DH5 $\alpha$             | $\Delta(argF-lac)169$ $\phi 80dlacZ58(M15)$ $\Delta phoA8$ $glnV44$<br><i>deoR481 gyrA96, recA1 endA1, hsdR17</i>     | Lab stock                  |
| BL21 (Tuner)             | F <sup>-</sup> <i>ompT hsdS<sub>B</sub> (r<sub>B</sub><sup>-</sup> m<sub>B</sub><sup>-</sup>) gal dcm lacYI</i>       | Novagen                    |
| Rosetta(DE3)<br>pLysS    | F <sup>-</sup> <i>ompT hsdS<sub>B</sub> (r<sub>B</sub><sup>-</sup> m<sub>B</sub><sup>-</sup>) gal dcm (DE3) pLysS</i> | Novagen                    |
| STL24                    | MG1655, $\Delta bioH$                                                                                                 | 1                          |
| ER90                     | $\Delta bioF bioC bioD$                                                                                               | 2,3                        |
| <i>H. pylori</i> 26695   | Wild-type strain                                                                                                      | 4                          |
| <b>Plasmids</b>          |                                                                                                                       |                            |
| pET-28b                  | Km <sup>r</sup> , T7 promoter-based expression vector, pBR322 origin                                                  | Novagen                    |
| pBluescript SKII         | Amp <sup>r</sup> , cloning vector                                                                                     | Stratagene                 |
| pHel2                    | Cm <sup>r</sup> , <i>E. coli-H. pylori</i> shuttle vector                                                             | 5                          |
| pTRKL2                   | Erm <sup>r</sup> , low-copy-number <i>E. coli/Lactococcus</i> shuttle vector                                          | 6                          |
| pBAD24M                  | Amp <sup>r</sup> , NcoI site of pBAD24 changed to an NdeI site, modified pBR322 origin                                | 7                          |
| pBAD33                   | Cm <sup>r</sup> , expression vector containing P <sub>BAD</sub> promoter and <i>araC</i> , pACYC184 origin            | 8                          |
| pBHK565                  | Amp <sup>r</sup> , HP0287 ( <i>bioV</i> ) cloned into the NdeI and SalI sites of pBAD24M                              | This work                  |
| pBHK566                  | Amp <sup>r</sup> , HP0288 cloned into the NdeI and SalI sites of pBAD24M                                              | This work                  |
| pBHK555                  | Km <sup>r</sup> , <i>bioV</i> cloned into the NdeI and SalI sites of pET-28b                                          | This work                  |
| pBHK624                  | Amp <sup>r</sup> , BioV S31A of BHK565                                                                                | This work                  |

|                         |                                                                                                                                                                                                                         |           |
|-------------------------|-------------------------------------------------------------------------------------------------------------------------------------------------------------------------------------------------------------------------|-----------|
| pBHK570                 | Amp <sup>r</sup> , BioV D141A of BHK565                                                                                                                                                                                 | This work |
| pBHK571                 | Amp <sup>r</sup> , BioV H167A of BHK565                                                                                                                                                                                 | This work |
| pBHK616                 | Km <sup>r</sup> , BioV S31A of BHK555                                                                                                                                                                                   | This work |
| pBHK576                 | Km <sup>r</sup> , BioV D141A of BHK555                                                                                                                                                                                  | This work |
| pBHK577                 | Km <sup>r</sup> , BioV H167A of BHK555                                                                                                                                                                                  | This work |
| pBHK532                 | Cm <sup>r</sup> , PCR-amplified <i>HpAcpS</i> inserted between the KpnI and HindIII sites of pBAD33                                                                                                                     | This work |
| pBHK531                 | Km <sup>r</sup> , PCR-amplified <i>HpAcpP</i> inserted between the NcoI and HindIII sites of pET28-b                                                                                                                    | This work |
| pBHK638                 | Amp <sup>r</sup> , Km <sup>r</sup> , pBluecript SKII (+) containing a cassette consisting of the regions upstream and downstream 600 bp of the <i>bioV</i> gene flanking the kanamycin resistance ( <i>aphA3</i> ) gene | This work |
| pBHK639                 | Cm <sup>r</sup> , Km <sup>r</sup> , pHel2 containing the cassette consisting of the regions upstream and downstream 600 bp of the <i>bioV</i> gene flanking the kanamycin resistance ( <i>aphA3</i> ) gene              | This work |
| pZL394                  | Amp <sup>r</sup> , <i>HCD_02280 (HcbioV)</i> cloned into the NdeI and Sall sites of pBAD24M                                                                                                                             | This work |
| pZL395                  | Amp <sup>r</sup> , <i>Hac_0547 (HabioV)</i> cloned into the NdeI and Sall sites of pBAD24M                                                                                                                              | This work |
|                         |                                                                                                                                                                                                                         |           |
| <b>Oligonucleotides</b> | <b>Sequence</b>                                                                                                                                                                                                         |           |
| bioV-f                  | ATCTGCC <u>CATATG</u> CGTTTTTTTTAGTGGTTTTGG                                                                                                                                                                             |           |
| bioV-r                  | ACTCTG <u>TGCGACTT</u> AAGATTTTTGCAACAAATGG                                                                                                                                                                             |           |
| HP0288-f                | CGTCGGCATATGAAAAAATTTGGTTTTGG                                                                                                                                                                                           |           |
| HP0288-r                | ATTCTG <u>TGCGACTT</u> AAAGCACATTTTTTCCAA GC                                                                                                                                                                            |           |
| HbioV-f                 | CAGGTCC <u>CATATG</u> CGTTTTTTTTAGTGGTTTTG                                                                                                                                                                              |           |

|          |                                                            |  |
|----------|------------------------------------------------------------|--|
| HabioV-r | ATCGT <u>GTCGACT</u> TAAGATTTTTGCAACAAAT<br>GG             |  |
| HcbioV-r | ATCTT <u>GTCGACT</u> TATTTCCACCCTTTTGATTC                  |  |
| HPAcpS-f | AATTAGAGCTCAGGAGTAAACGAATGATTG<br>GCATAGATATTG             |  |
| HPAcpS-r | GCGCGGGT <u>TACCT</u> TATTCATTTGACGAAGAAA<br>C             |  |
| HPAcpP-f | ACTGAACCATGGGCATGGCTTTATTTGAAGA<br>TATTC                   |  |
| HPAcpP-r | GGCCAAGCTTAAGCCAGTTTATTATCCTC                              |  |
| S31A-f   | CCTTAATCGCACCCATAGCAAAGCCTGACAC<br>ATCATA                  |  |
| S31A-r   | TATGATGTGTCAGGCTTTGCTATGGGTGCGA<br>TTAAGG                  |  |
| D141A-f  | AAAAGGGCTTGAATGTCAGTGATTTTAGCTT<br>TTAAACCGATAAACACTTCAATC |  |
| D141A-f  | GATTGAAGTGTTTATCGGTTTAAAAGCTAAA<br>ATCACTGACATTCAAGCCCTTTT |  |
| H167A-f  | CGACTTAAGATTTTTGCAACAAAGCGTTGCA<br>ATCCTTAAACTGCCACA       |  |
| H167A-r  | TGTGGCAGTTTAAGGATTGCAACGCTTTGTT<br>GCAAAAATCTTAAGTCG       |  |
| BioVmut1 | AATGACTCGAGAATGAAAGCGCTCTAAACG                             |  |
| BioVmut2 | ATAGAGT <u>CGACT</u> TCACCCGTTCAATAAATCA<br>T              |  |
| BioVmut3 | ATAAAGT <u>CGACG</u> CGAACCATTTGAGGTGATA<br>G              |  |
| BioVmut4 | TTTCATCTTCCACCTTTTTTAAAACAATTCAT<br>CCAGT                  |  |
| BioVmut5 | ACTGGATGAATTGTTTTAAAAAAGGTGGAAG<br>ATGAAA                  |  |
| BioVmut6 | ATTATGGAT <u>CCTG</u> CTACCCTCTCATTTCTTA                   |  |

The underlined sequences are restriction sites.

**Supplementary Table 2. *H. pylori* biotin and fatty acid synthesis genes**

| <b>Genes/genetic loci</b>                 | <b>Enzyme activity</b>                                   |
|-------------------------------------------|----------------------------------------------------------|
| <b>Biotin biosynthesis and attachment</b> |                                                          |
| <i>bplA</i> (HP1140)                      | Biotin protein ligase                                    |
| <i>bioC</i> (HP1254)                      | SAM-dependent malonyl-ACP<br><i>O</i> -methyltransferase |
| <i>bioV</i> (HP0287)                      | Pimeloyl-ACP methyl ester esterase                       |
| <i>bioF</i> (HP0598)                      | 8-amino-7-oxononanoate synthase                          |
| <i>bioA</i> (HP0976)                      | 7,8-diaminononanoate synthase                            |
| <i>bioD</i> (HP0029)                      | Desthiobiotin synthase                                   |
| <i>bioB</i> (HP1406)                      | Biotin synthase, SAM radical enzyme                      |
| <b>Fatty acid biosynthesis</b>            |                                                          |
| <i>accA</i> (HP0557)                      | Carboxyl-transferase subunit                             |
| <i>accB</i> (HP0371)                      | Biotin carboxyl carrier protein (BCCP)                   |
| <i>accC</i> (HP0370)                      | Biotin carboxylase                                       |
| <i>accD</i> (HP0950)                      | Carboxyl-transferase subunit                             |
| <i>acpP</i> (HP0559)                      | apo-ACP                                                  |
| <i>acpS</i> (HP0808)                      | Holo-ACP synthase                                        |
| <i>fabD</i> (HP0090)                      | Malonyl-CoA : ACP transacylase                           |
| <i>fabF</i> (HP0558)                      | 3-Ketoacyl-ACP synthase II                               |
| <i>fabH</i> (HP0202)                      | 3-Ketoacyl-ACP synthase III                              |
| <i>fabG</i> (HP0561)                      | 3-Ketoacyl-ACP reductase                                 |
| <i>fabZ</i> (HP1376)                      | 3-Hydroxyacyl-ACP dehydrase                              |
| <i>cfa</i> (HP0416)                       | Cyclopropane fatty acyl phospholipid synthase            |
| <i>fabI</i> (HP0195)                      | Enoyl-ACP reductase I                                    |
| <i>ufaA</i> (HP0773)                      | Involved in unsaturated fatty acid biosynthesis          |

Abbreviation: SAM, *S*-adenosylmethionine

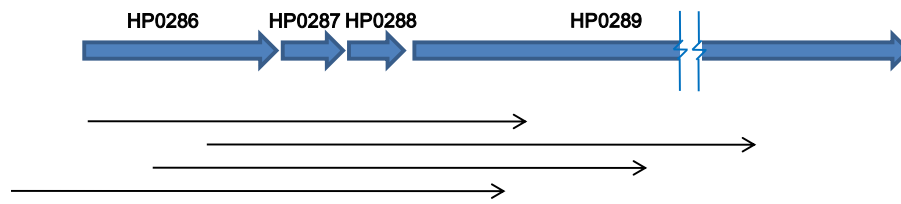

**Supplementary Figure 1. The DNA segment common to the complementing clones from the clone bank plasmids.** The map at the top of the panel is a section of the pathogenic *H. pylori* strain 26695 genome sequence. HP0287 and HP0288 are ORFs annotated as coding for a hypothetical protein and a membrane protein, respectively. The arrows below the region map represent the four clone bank plasmids that complemented growth the *E. coli*  $\Delta$ *bioH* mutant strain STL24on biotin-free media.

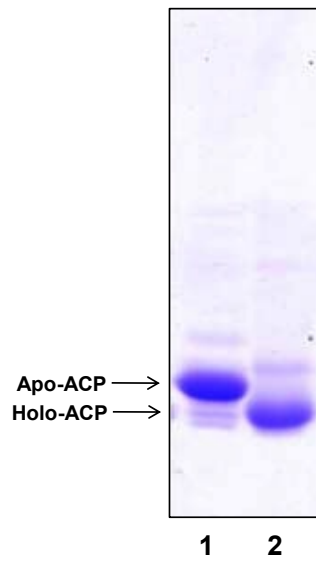

**Supplementary Figure 2. Purification of *H. pylori* holo-ACP.**

The *H. pylori* apo-ACP was expressed in *E. coli* Rosetta (DE3) pLysS transformed with pBHK531 carrying the *H. pylori acpP* gene (lane 1). The plasmid pBHK532 carrying the *H. pylori acpS* gene was also transformed into the strain to express the holo-ACP (lane 2). The *H. pylori* apo-ACP (lane 1) and holo-ACP (lane 2) were purified as described previously for the *E. coli* proteins<sup>9</sup>.

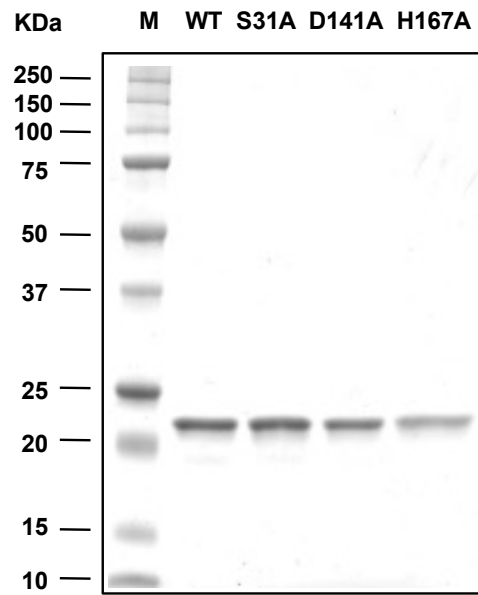

**Supplementary Figure 3. SDS-PAGE analysis of the purified BioV and three mutant BioV proteins.** Protein samples were separated by electrophoresis using 4-20% gradient SDS-PAGE.



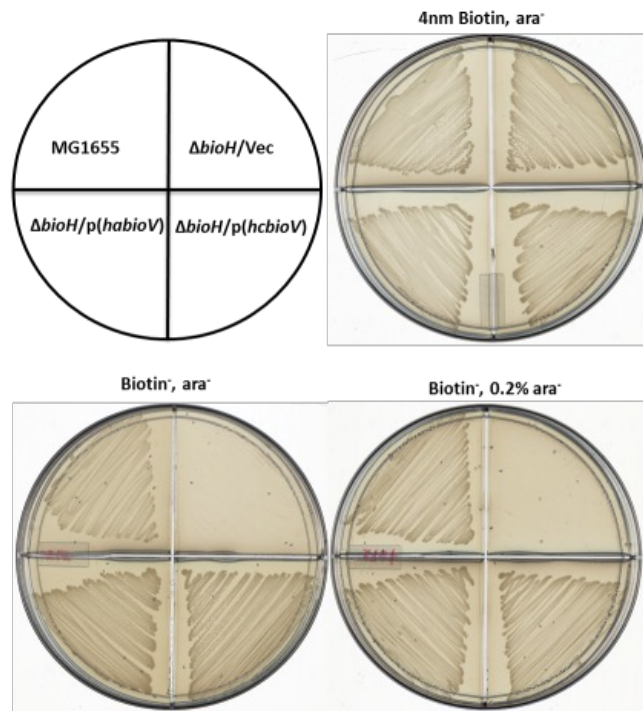

**Supplementary Figure 4. Expression of the *bioV* homologues from *Helicobacter acinonychis* or *Helicobacter ceterum* allows growth of an *E. coli*  $\Delta$ *bioH* strain.**

Transformants of strain STL24 (an *E. coli*  $\Delta$ *bioH* strain) were grown at 37°C on biotin-free minimal medium. Growth was tested in either the presence or the absence of arabinose as in Fig. 2. The growth of all strains in the presence of biotin was used as a positive control. The strains tested were: MG1655 (wild type), STL24 carrying plasmids pZL394 and pZL395 encoding *HcbioV* and *HabioV*, respectively, or the vector plasmid (Vec), pBAD24M.

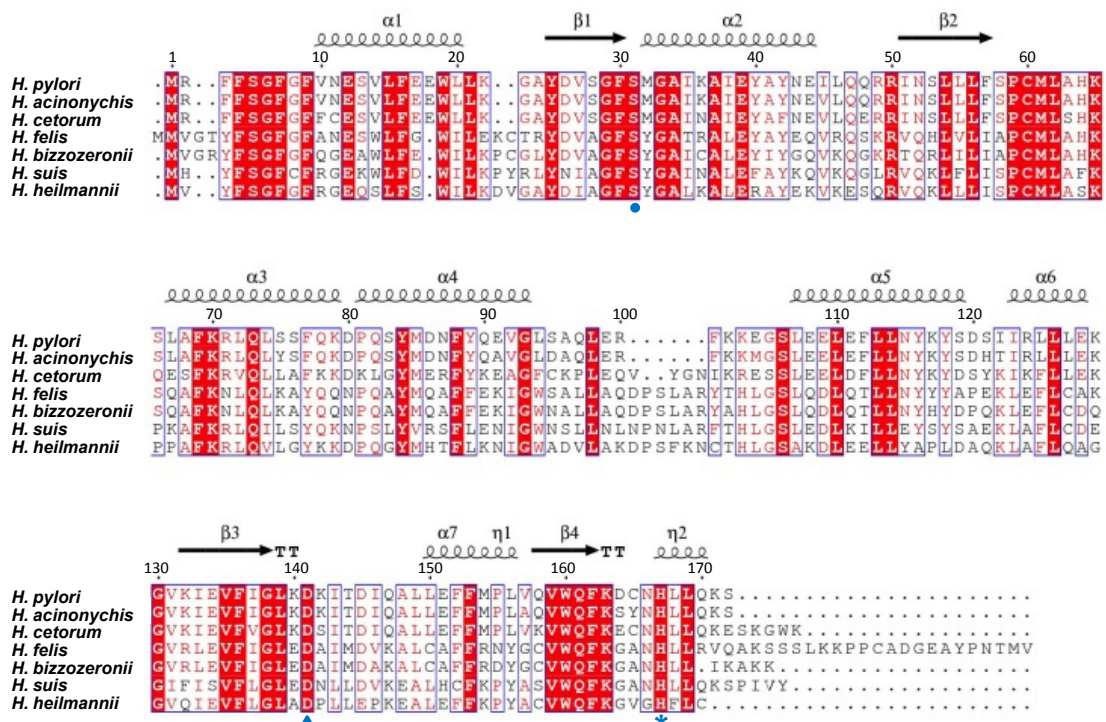

**Supplementary Figure 5. Multiple protein sequence alignments of seven BioV homologues from different *Helicobacter* species.**

The predicted protein sequences of the BioV homologues are HP0287 from *H. pylori*, Hac\_0547 from *H. acinonychis*, HCD\_02280 from *H. cetorum*, HFELIS\_03760 from *H. felis*, HBZC1\_04080 from *H. bizzozeronii*, HSUHS5\_1172 from *H. suis* and HHE01\_17100 from *H. heilmannii*. The identical residues are in white letters with red background, and the varied residues are in black letters. The predicted protein secondary structure of BioV is given in cartoon form, which is based on the structural architecture of the arylesterase from *Pseudomonas fluorescens* (PDB: 3HI4) <sup>10</sup>. Designations: α: alpha-helix; β: beta-sheet; T: Turn; η: coil. The solid circle, triangle and asterisk denote the active-site residues.

## Supplemental References

1. Lin, S., Hanson, R.E. & Cronan, J.E. Biotin synthesis begins by hijacking the fatty acid synthetic pathway. *Nat Chem Biol* **6**, 682-8 (2010).
2. Choi-Rhee, E. & Cronan, J.E. A nucleosidase required for in vivo function of the S-adenosyl-L-methionine radical enzyme, biotin synthase. *Chem Biol* **12**, 589-93 (2005).
3. Choi-Rhee, E. & Cronan, J.E. Biotin synthase is catalytic in vivo, but catalysis engenders destruction of the protein. *Chem Biol* **12**, 461-8 (2005).
4. Tomb, J.F. et al. The complete genome sequence of the gastric pathogen *Helicobacter pylori*. *Nature* **388**, 539-47 (1997).
5. Heuermann, D. & Haas, R. A stable shuttle vector system for efficient genetic complementation of *Helicobacter pylori* strains by transformation and conjugation. *Mol Gen Genet* **257**, 519-28 (1998).
6. O'Sullivan, D.J. & Klaenhammer, T.R. High- and low-copy-number *Lactococcus* shuttle cloning vectors with features for clone screening. *Gene* **137**, 227-31 (1993).
7. Zhu, L., Lin, J., Ma, J., Cronan, J.E. & Wang, H. Triclosan resistance of *Pseudomonas aeruginosa* PAO1 is due to FabV, a triclosan-resistant enoyl-acyl carrier protein reductase. *Antimicrob Agents Chemother* **54**, 689-98 (2010).
8. Guzman, L.M., Belin, D., Carson, M.J. & Beckwith, J. Tight regulation, modulation, and high-level expression by vectors containing the arabinose PBAD promoter. *J Bacteriol* **177**, 4121-30 (1995).
9. Cronan, J.E. & Thomas, J. Bacterial fatty acid synthesis and its relationships with polyketide synthetic pathways. *Methods Enzymol* **459**, 395-433 (2009).
10. Yin de, L.T. et al. Switching catalysis from hydrolysis to perhydrolysis in *Pseudomonas fluorescens* esterase. *Biochemistry* **49**, 1931-42 (2010).
